# Supplementary material for: TNFAIP2 confers cisplatin resistance in head and neck squamous cell carcinoma via KEAP1/NRF2 signaling
Source: PubMed Central journal article supplement (PMC10391982; doi:10.1186/s13046-023-02775-1), 2023-08-01

Full unedited gel for Figure 2K

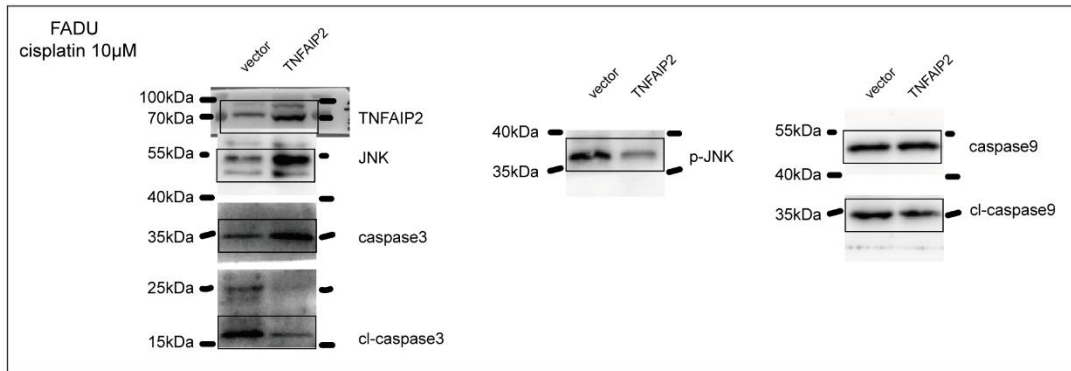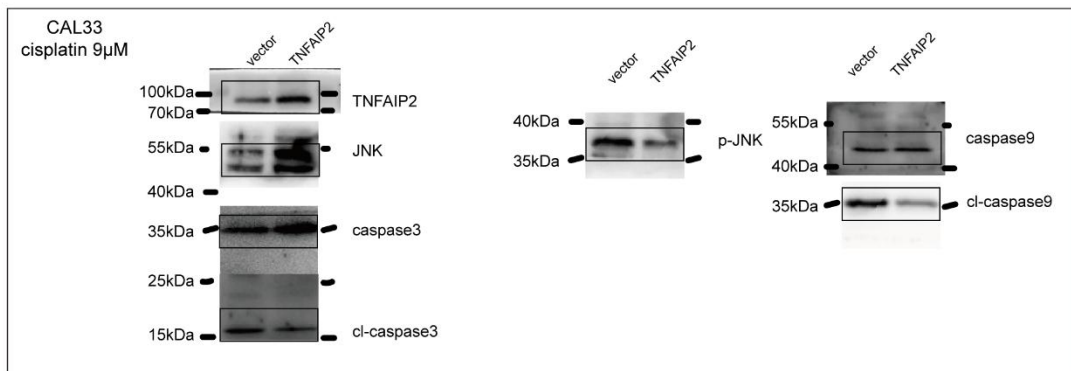

Full unedited gel for Figure 2L

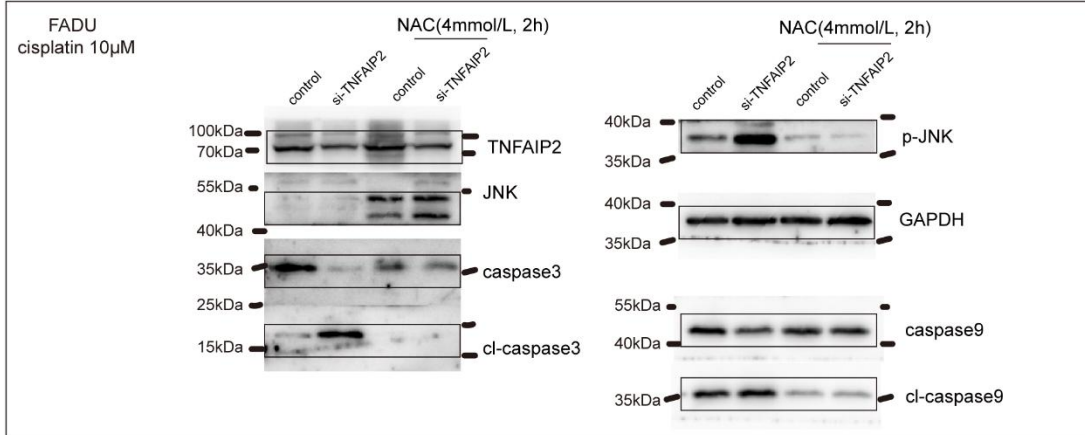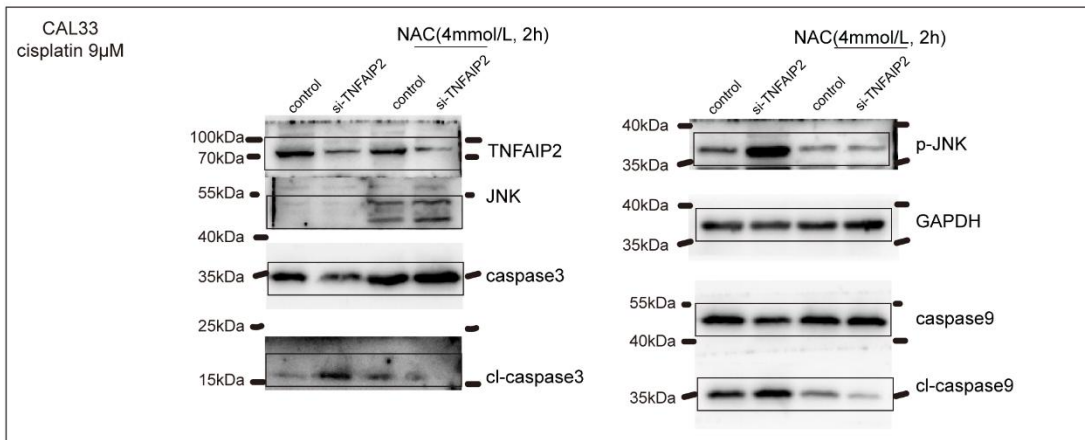

Full unedited gel for Figure 3G

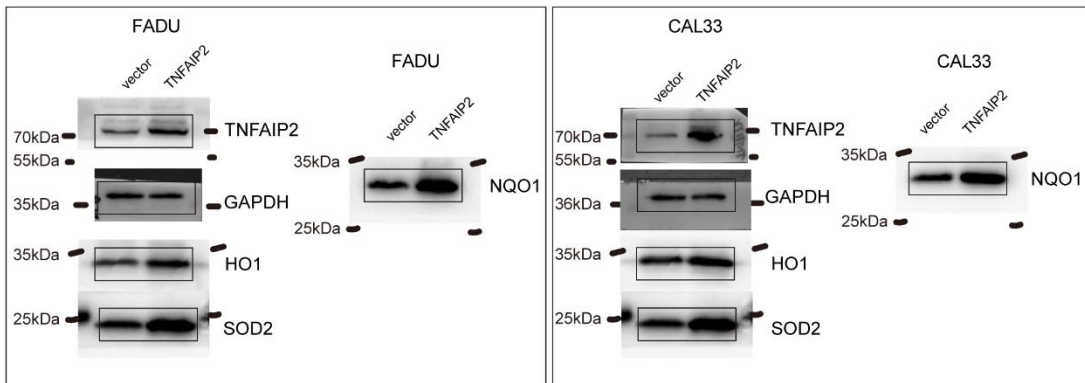

Full unedited gel for Figure 3I

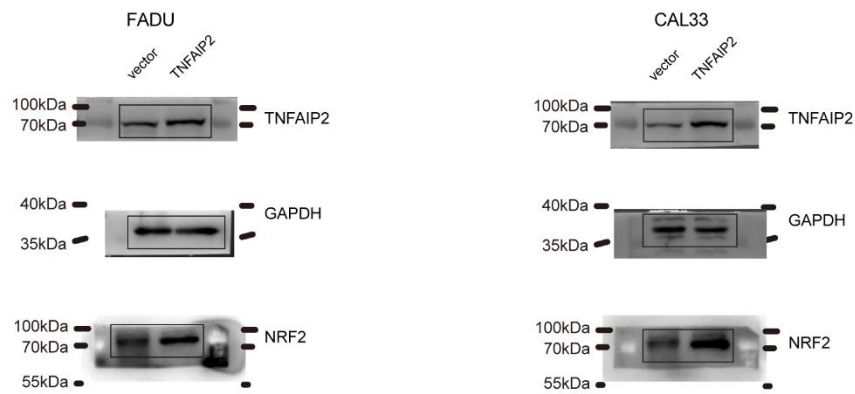

Full unedited gel for Figure 3J

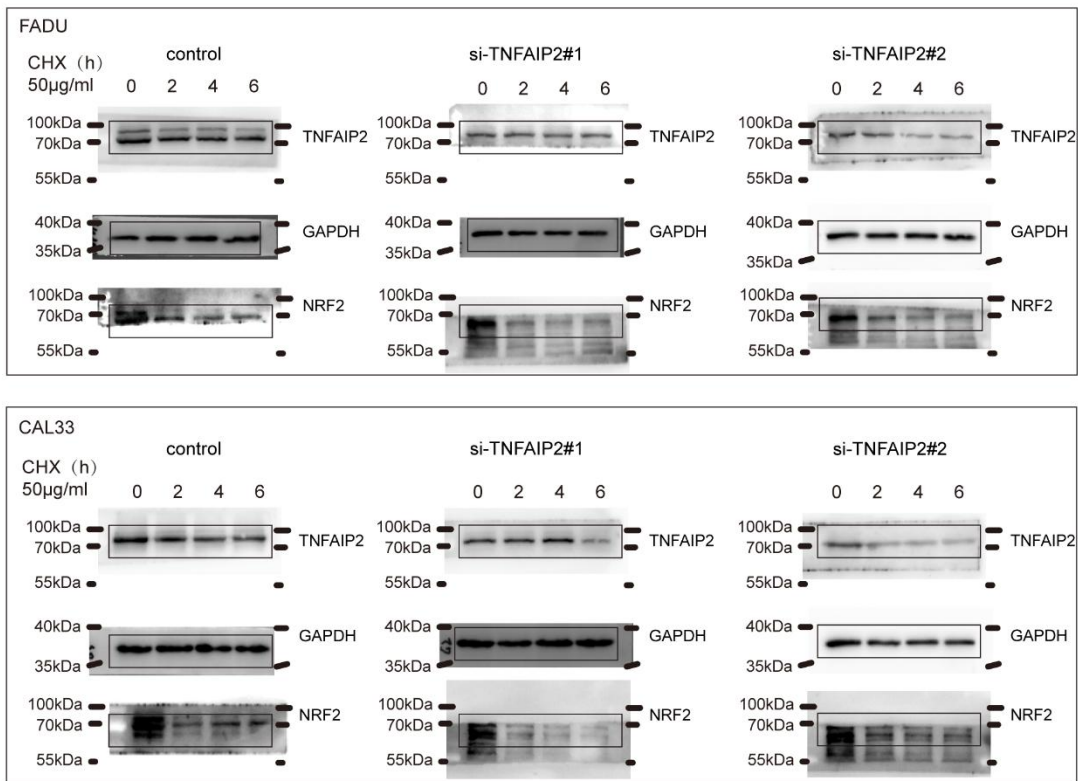

Full unedited gel for Figure 3K

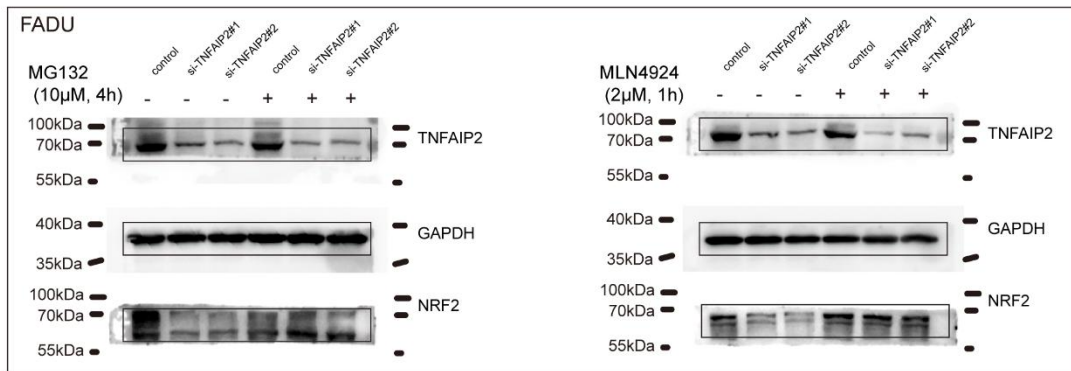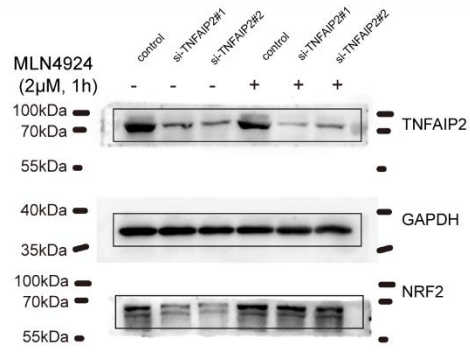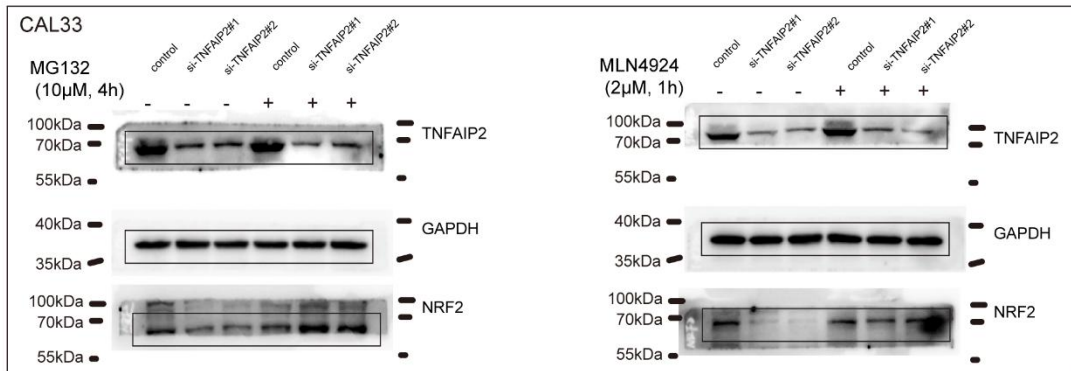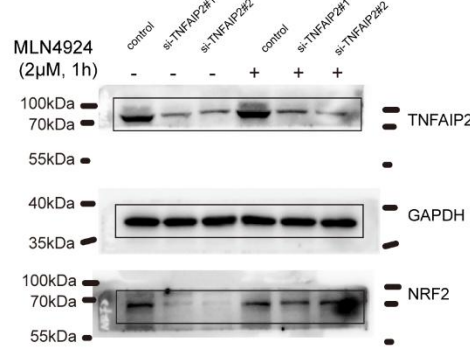

Full unedited gel for Figure 3L

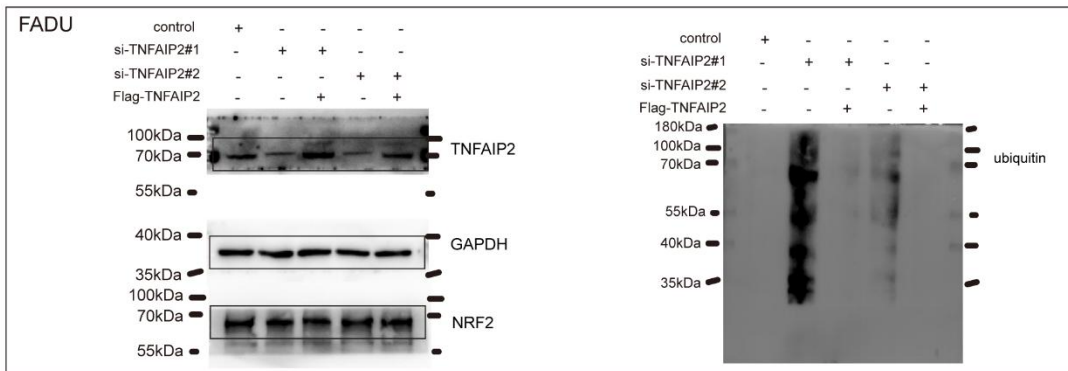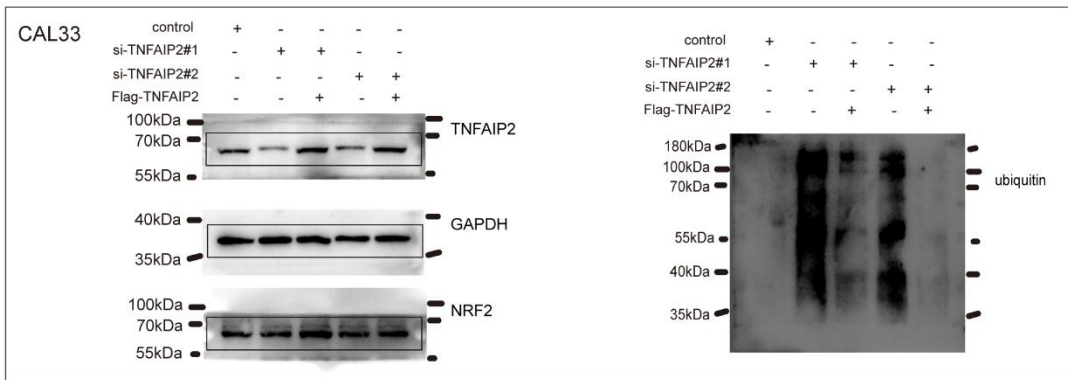

Full unedited gel for Figure 4B

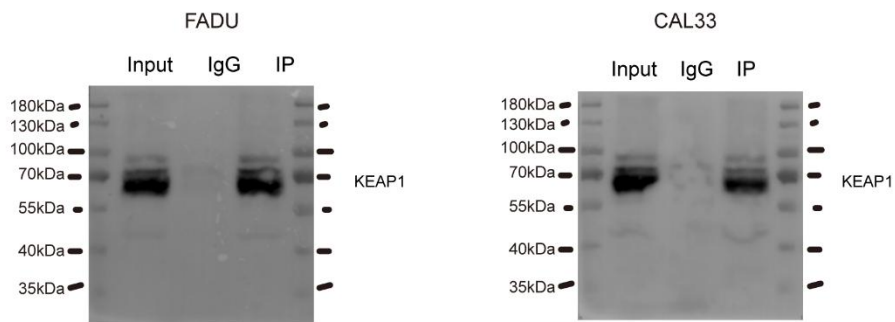

Full unedited gel for Figure 4F

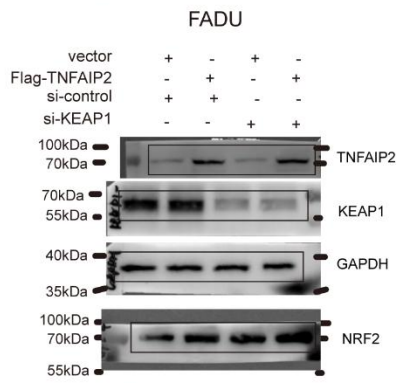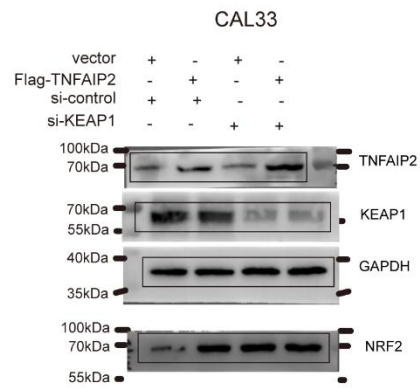

Full unedited gel for Figure 4G

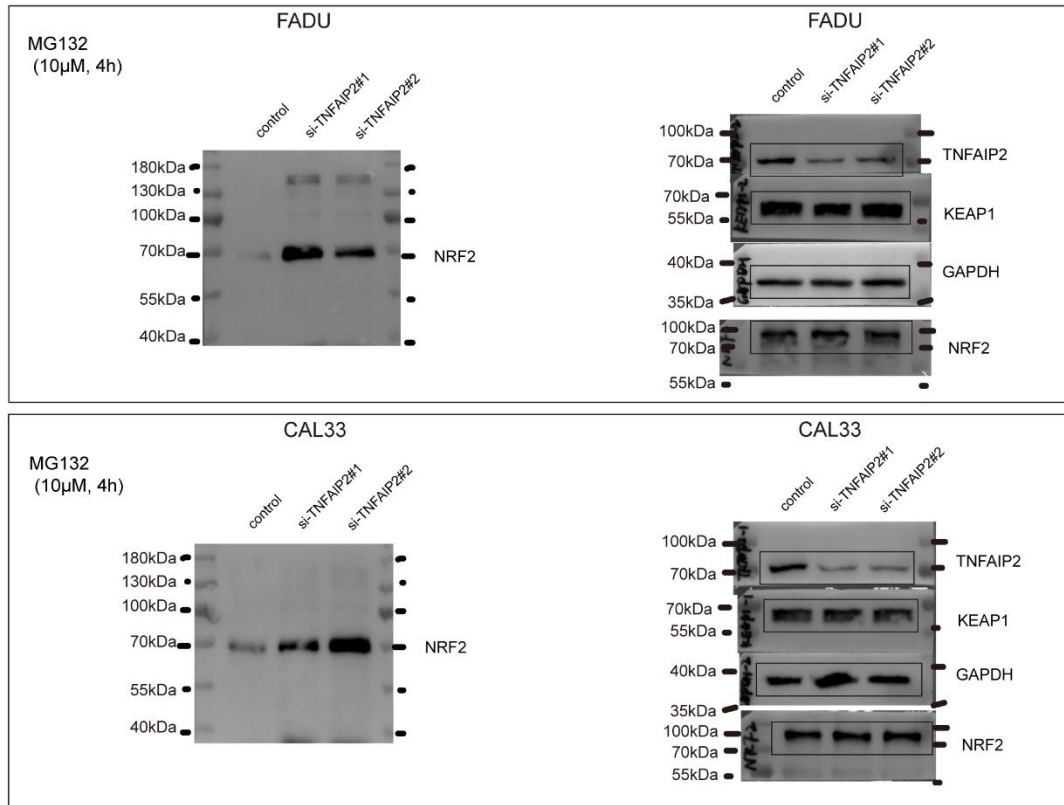

Full unedited gel for Figure 4H

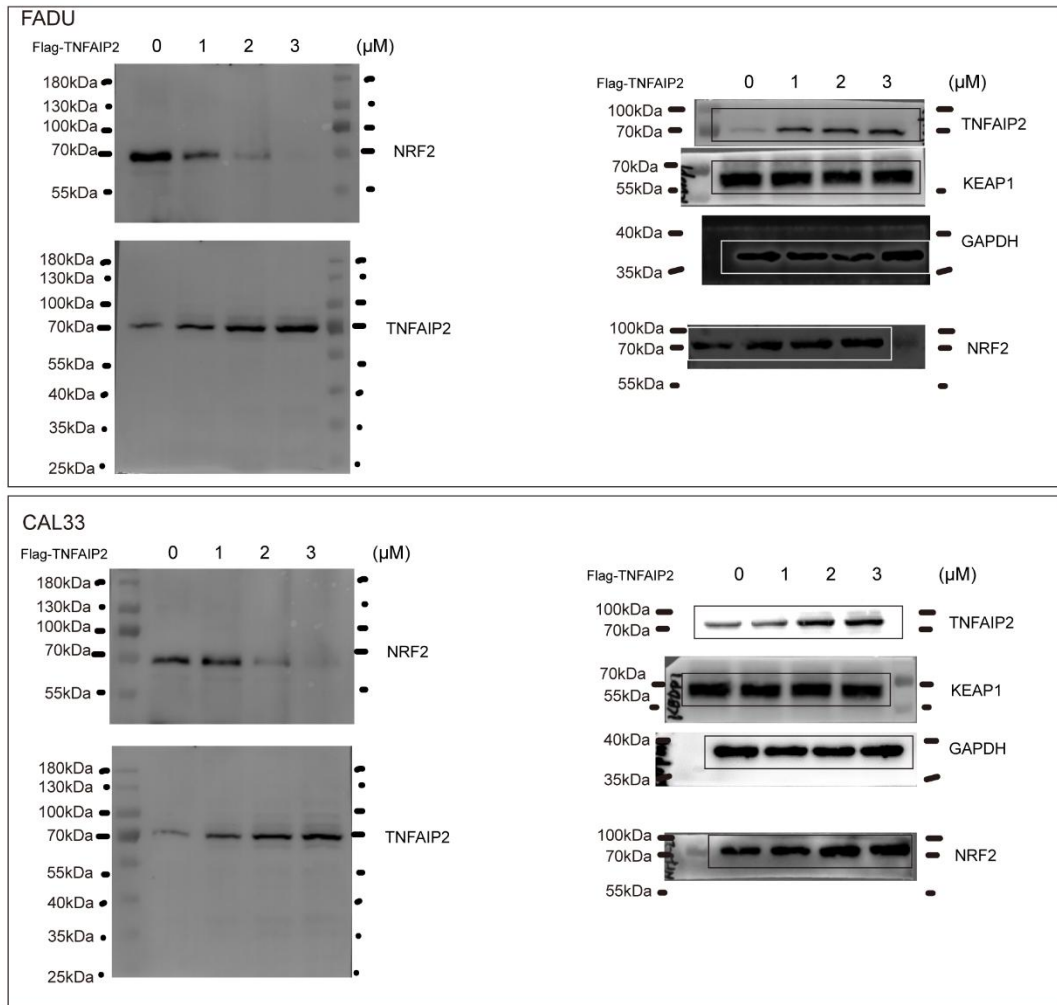

Full unedited gel for Figure 5B

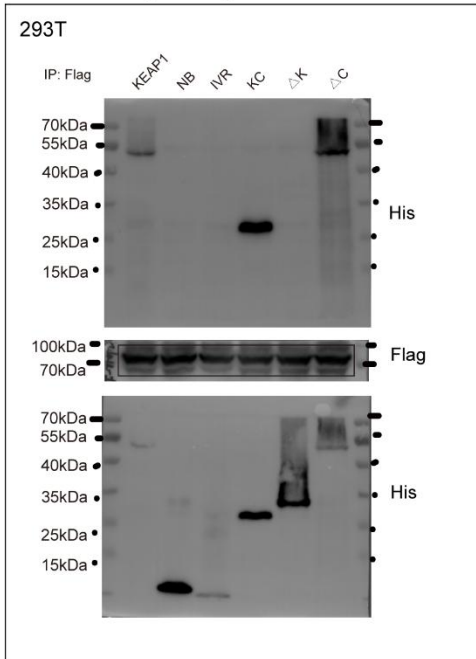

Full unedited gel for Figure 5C

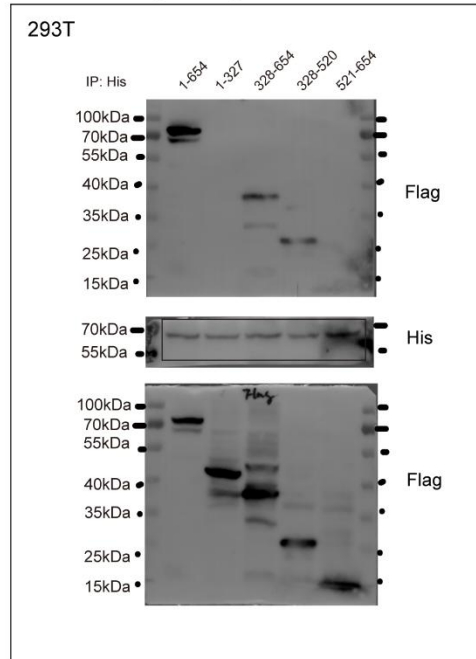

Full unedited gel for Figure 5E

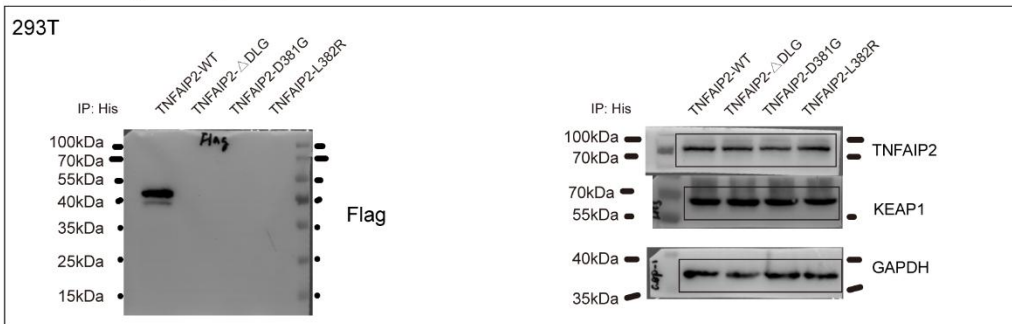



Full unedited gel for Figure 5F

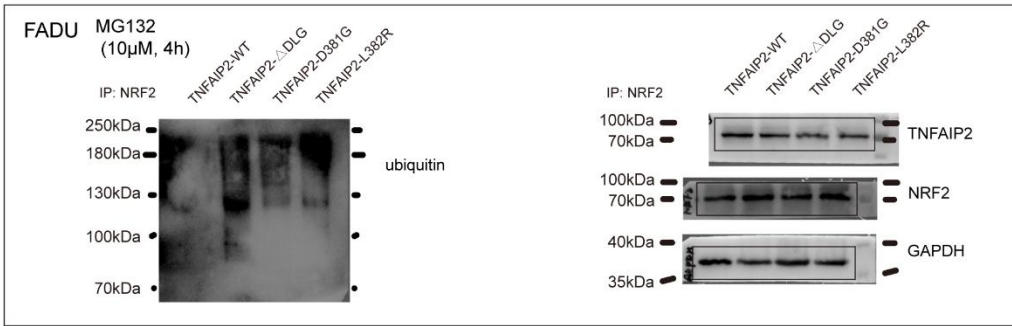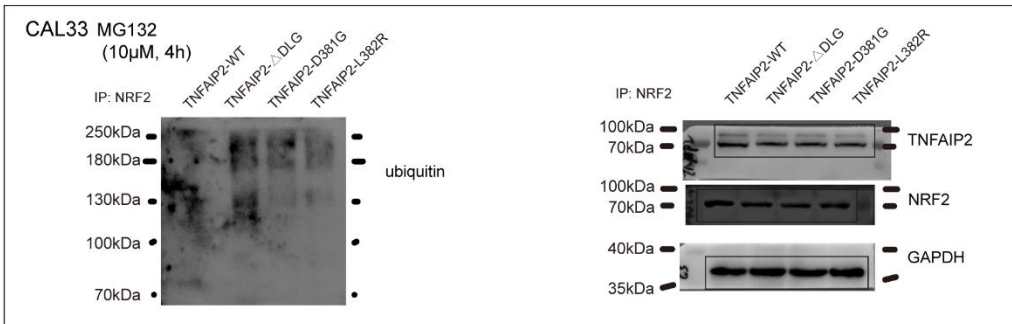

Full unedited gel for Figure 5J

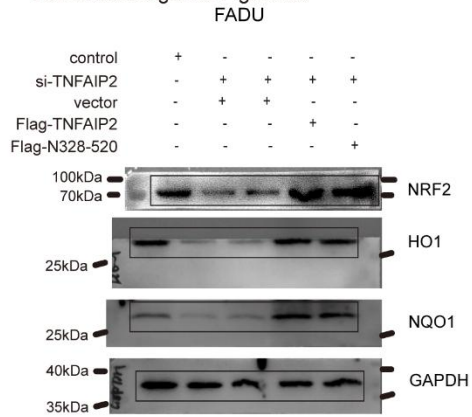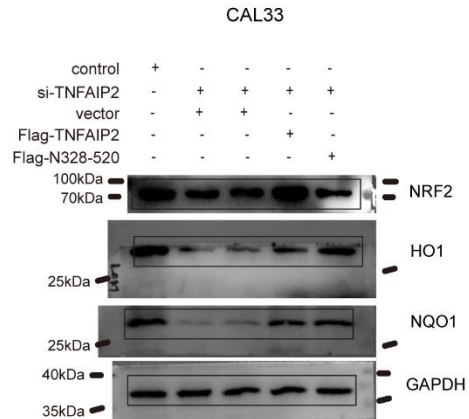

Full unedited gel for Figure 7A

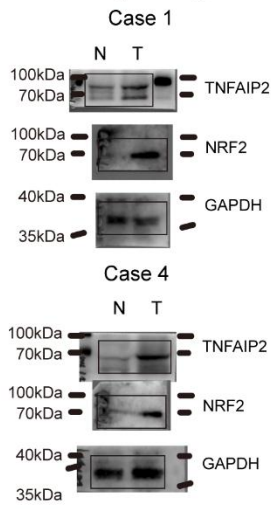

N, Normal tissue T, Tumor tissue

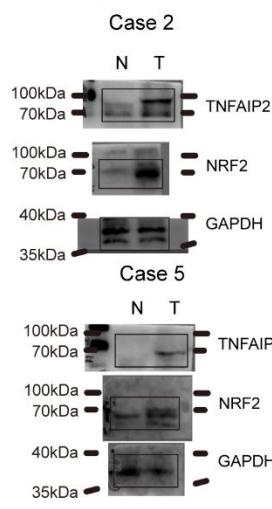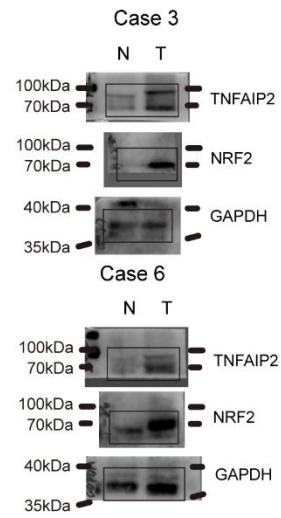

Full unedited gel for Figure S1B

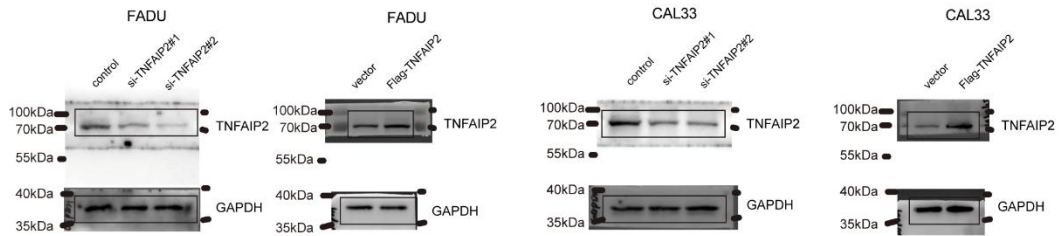

Full unedited gel for Figure S3D

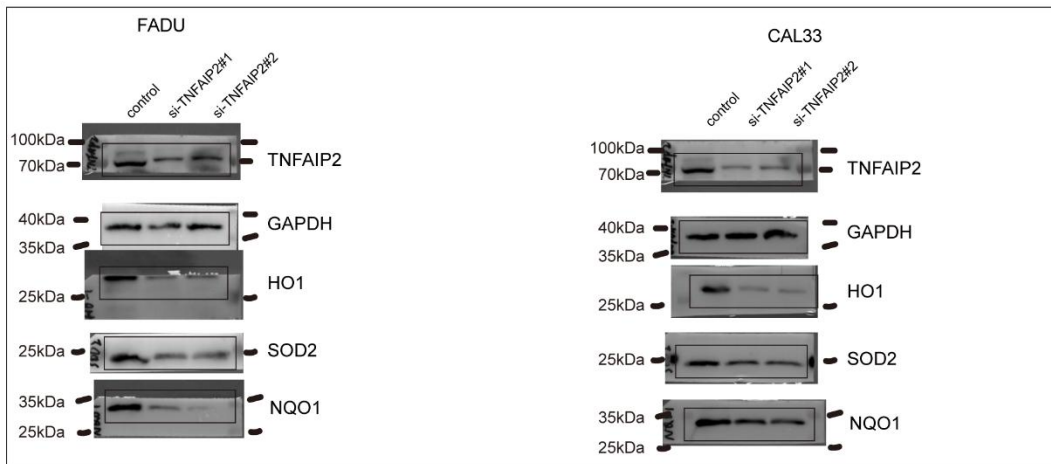

Full unedited gel for Figure S3F

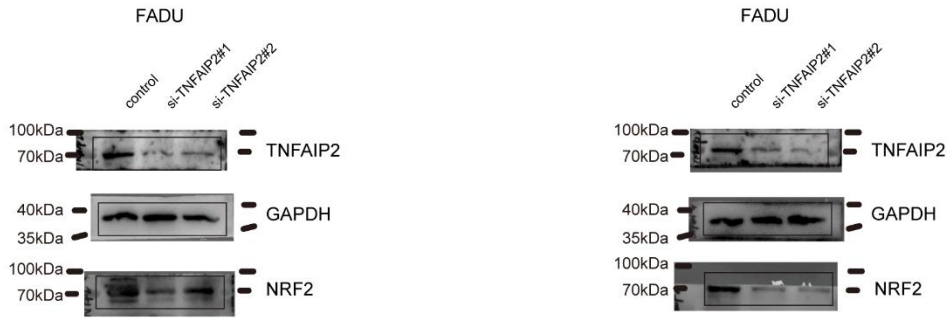

Full unedited gel for Figure S4C

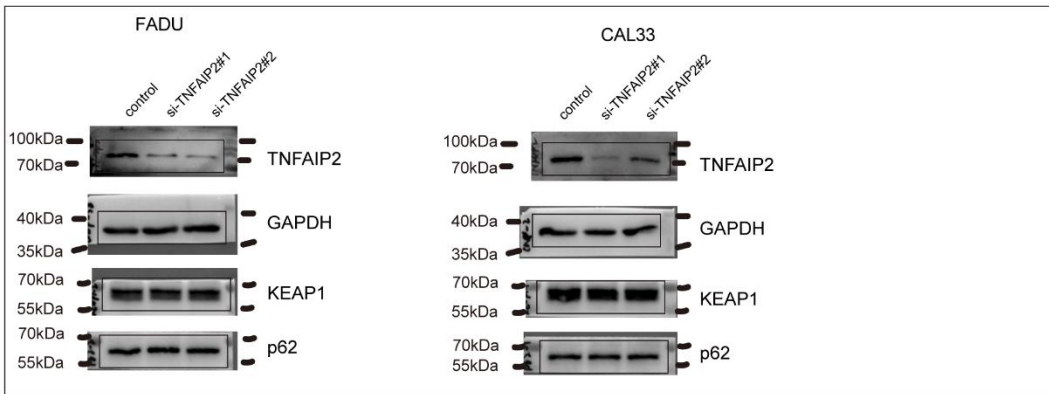

Full unedited gel for Figure S4D

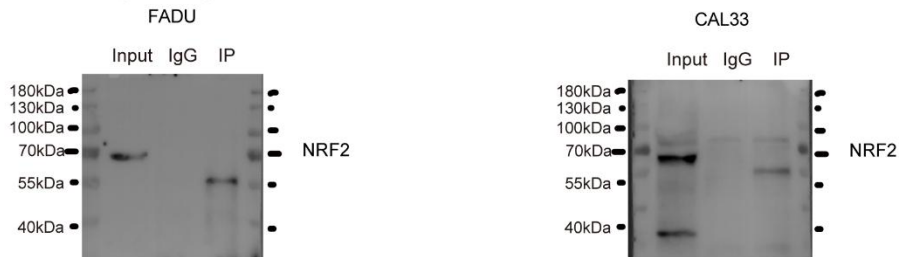

Supplement: 13046_2023_2775_MOESM4_ESM.pdf [file 13046_2023_2775_MOESM4_ESM.pdf]
